# Supplementary material for: Pharmacologic targeting ERK1/2 attenuates the development and progression of hyperuricemic nephropathy in rats
Source: PubMed Central journal article supplement (PMC5464913; doi:10.18632/oncotarget.16995), 2017-04-10
Supplement: oncotarget-08-33807-s001.pdf [file oncotarget-08-33807-s001.pdf]

# Pharmacologic targeting ERK1/2 attenuates the development and progression of hyperuricemic nephropathy in rats

## SUPPLEMENTARY FIGURES

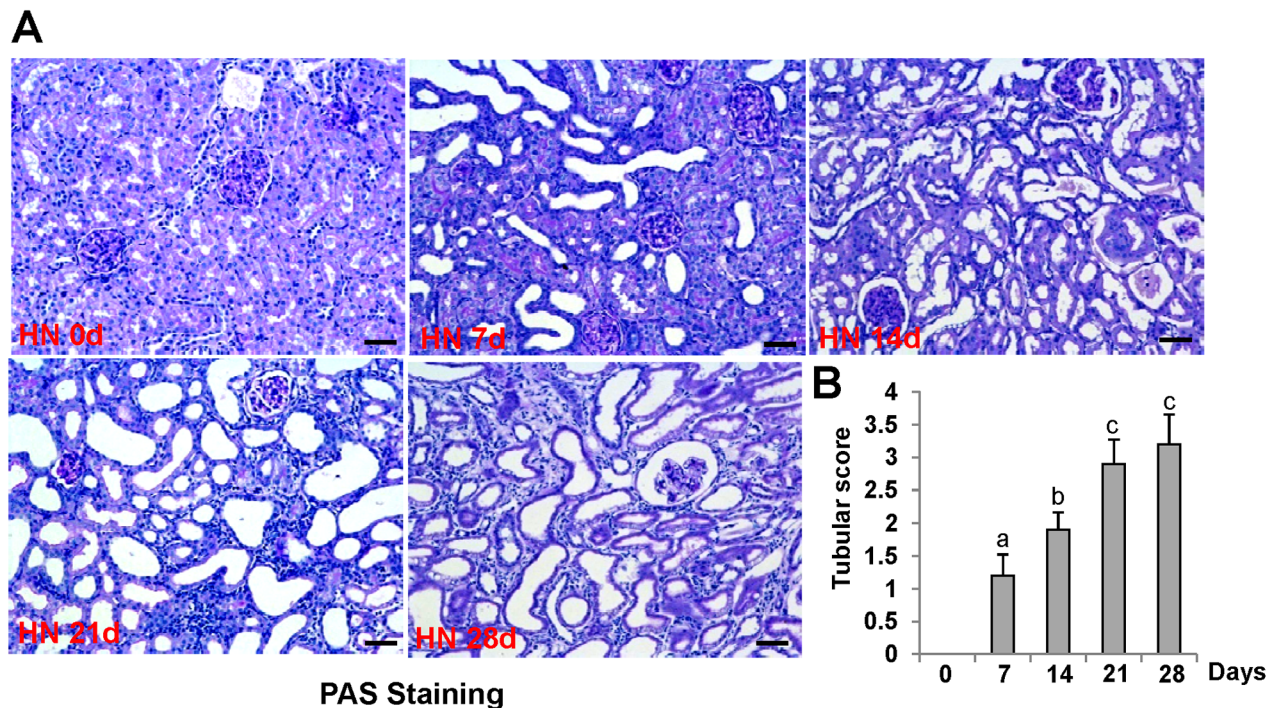

**Supplementary Figure 1: Pathological changes in the kidney of hyperuricemic rats in a time-dependent manner. (A)** Photomicrographs (original magnification, ×200) illustrate periodic acid-Schiff staining of the kidney tissues of hyperuricemic rats in a time-dependent manner. **(B)** Morphologic changes were scored on the basis of the scale described in the Concise Methods section. Data are represented as the mean±SEM (*n*=6). Means with different letters are significantly different from one another (*P*<0.05). The scale bar in all of the images is 20 μm.

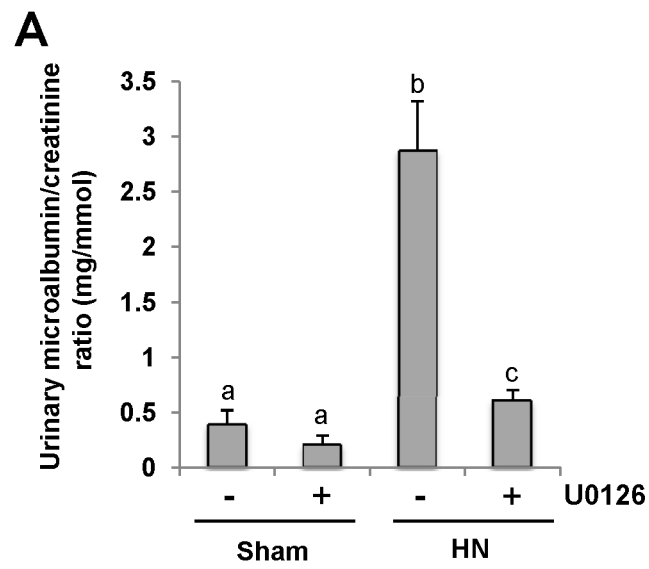

**Supplementary Figure 2: U0126 alleviates urinary microalbumin/creatinine ratio in hyperuricemic rats.** Urinary microalbumin and creatinine were examined using automatic biochemistry assay. The microalbumin/creatinine ratio was calculated. Data are represented as the mean $\pm$ SEM ( $n=6$ ). Means with different letters are significantly different from one another ( $P<0.05$ ).
